# Supplementary material for: Myotubularin-related protein protects against neuronal degeneration mediated by oxidative stress or infection
Source: PubMed Central journal article supplement (PMC8889260; doi:10.1016/j.jbc.2022.101614), 2022-01-29
Supplement: mmc3.pdf [file mmc3.pdf]

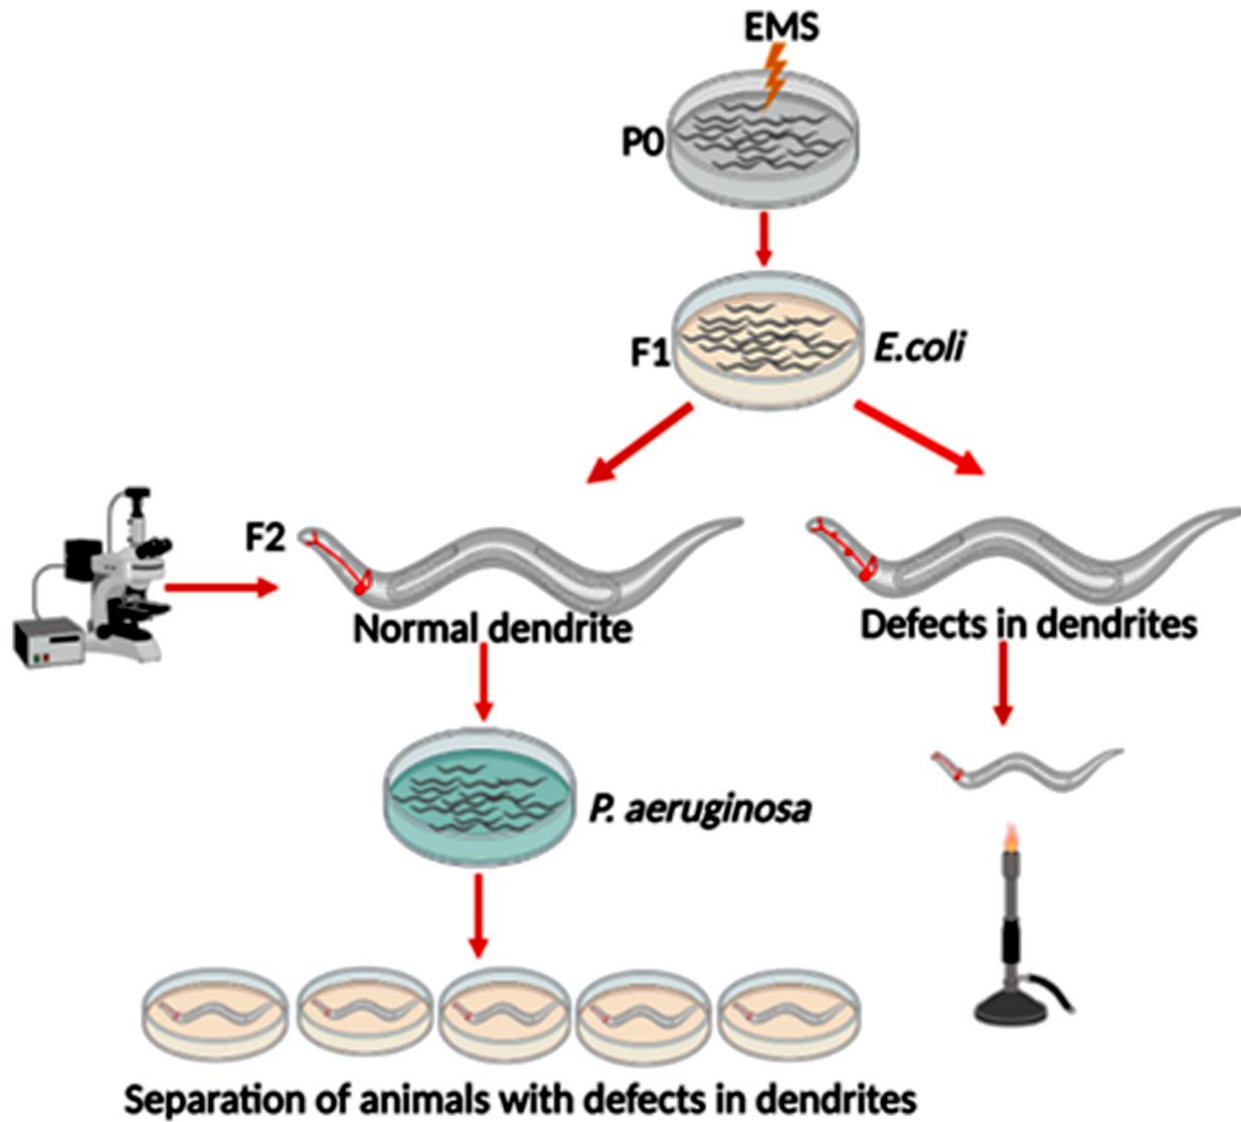

**Figure S1.** Schematic representation of the forward genetic screen. Animals (P0) were treated with ethylmethanesulfonate (EMS) and the animals of the F1 progeny were self-fertilized. Then, dendrites of F2 animals were analyzed for degeneration, and animals showing any changes were discarded. The mutant animals with normal dendrites were infected with *P. aeruginosa* for 24 h and then screened for dendrite degeneration.

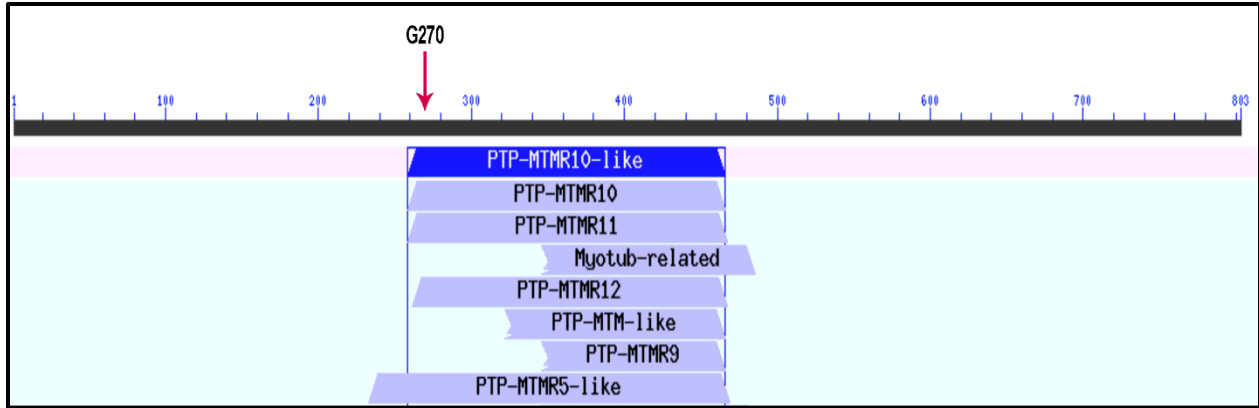

**Figure S2.** The mutation in the *mtm-10* gene G270A from glycine(G) to arginine(A) at residue 270 is in the conserved PTP-MTMR10-like domain.

|           |      |                                                                                  |                       |      |
|-----------|------|----------------------------------------------------------------------------------|-----------------------|------|
| Y48G1C.10 | 225  | GFNYAAQgYPVYVVVSNFLDRVDIERQLQHYKQGRFPPIVWWSR-ANGHSALFVSA-D                       | -----                 | 279  |
| MTM-5     | 184  | KYKLCGS-YPQELIVPAWITDKLELSVSSFRSWKRIPAVIYRHqSNGAVIARCG---                        | QPEVSWWGWNRNADDEHLVQ  | 255  |
| MTMR3     | 182  | NYKLCPS-YPQKLLVPVWITDKELENVASFRSWKRIPVVVYRHlRNGAAIARCS---                        | QPEISWWGWNRNADDEYLVLT | 253  |
| MTMR4     | 232  | GKVCER-LPAYFVVVPTPLPEENVQRFQ-----HGPIWCWSC-HNGSALLKMSALP                         | -----                 | 282  |
| MTMR12    | 222  | GYMISTC-LPEYFVVPSSLADQDLKVFSSHSFVGRMPFCWWSH-SNGSALVR-TALI                        | -----                 | 275  |
| MTMR10    | 1026 | DYTICPS-YPGNFIVPSETNESELAKVAKGFVEHRLPVVVMN-ENGALLVRASAFPT[14]RRNASKLTGSMTGSQOTLH | -----                 | 1113 |

**Figure S3.** The mutation site G270 is conserved among several MTMR family proteins.

| Input Order | Search Term | Worm GeneID | WormBaseID     | Worm Symbol | Species 2 | Human GeneID | Human Species Gene ID | Human Symbol | Ensembl ID (link HPA) | DIOPT Score | Weighted Score | Rank     | Best Score | Best Score Reverse | Prediction Derived From                     | Alignment & Scores   | Feedback | Gene Details                                                               |
|-------------|-------------|-------------|----------------|-------------|-----------|--------------|-----------------------|--------------|-----------------------|-------------|----------------|----------|------------|--------------------|---------------------------------------------|----------------------|----------|----------------------------------------------------------------------------|
| 1           | Y48G1C.10   | 353378      | WBGene00021683 | Y48G1C.10   | Human     | 54893        | 25999                 | MTMR10       | ENSG00000166912       | 5           | 4.84           | high     | Yes        | Yes                | Compara, eggNOG, OrthoDB, orthoMCL, Panther | <a href="#">View</a> | Add      | G2F details (MTMR10)<br>DfscDB Data: (MTMR10)<br>Human Protein Atlas (HPA) |
| 1           | Y48G1C.10   | 353378      | WBGene00021683 | Y48G1C.10   | Human     | 54545        | 18191                 | MTMR12       | ENSG00000150712       | 4           | 3.94           | moderate | No         | Yes                | Compara, eggNOG, OrthoDB, Panther           | <a href="#">View</a> | Add      | G2F details (MTMR12)<br>DfscDB Data: (MTMR12)<br>Human Protein Atlas (HPA) |
| 1           | Y48G1C.10   | 353378      | WBGene00021683 | Y48G1C.10   | Human     | 10903        | 24307                 | MTMR11       | ENSG0000014914        | 4           | 3.94           | moderate | No         | Yes                | Compara, eggNOG, OrthoDB, Panther           | <a href="#">View</a> | Add      | G2F details (MTMR11)<br>DfscDB Data: (MTMR11)<br>Human Protein Atlas (HPA) |
| 1           | Y48G1C.10   | 353378      | WBGene00021683 | Y48G1C.10   | Human     | 9108         | 7454                  | MTMR7        | ENSG00000003987       | 2           | 1.83           | low      | No         | No                 | Compara, eggNOG                             | <a href="#">View</a> | Add      | G2F details (MTMR7)<br>DfscDB Data: (MTMR7)<br>Human Protein Atlas (HPA)   |
| 1           | Y48G1C.10   | 353378      | WBGene00021683 | Y48G1C.10   | Human     | 9107         | 7453                  | MTMR6        | ENSG00000139505       | 2           | 1.83           | low      | No         | No                 | Compara, eggNOG                             | <a href="#">View</a> | Add      | G2F details (MTMR6)<br>DfscDB Data: (MTMR6)<br>Human Protein               |

**Figure S4.** Orthology analysis of the gene *Y48G1C.10* with the human *MTMR* (myotubularin related proteins genes) using the online tool DRSC Integrative Ortholog Prediction Tool (DIOPT).

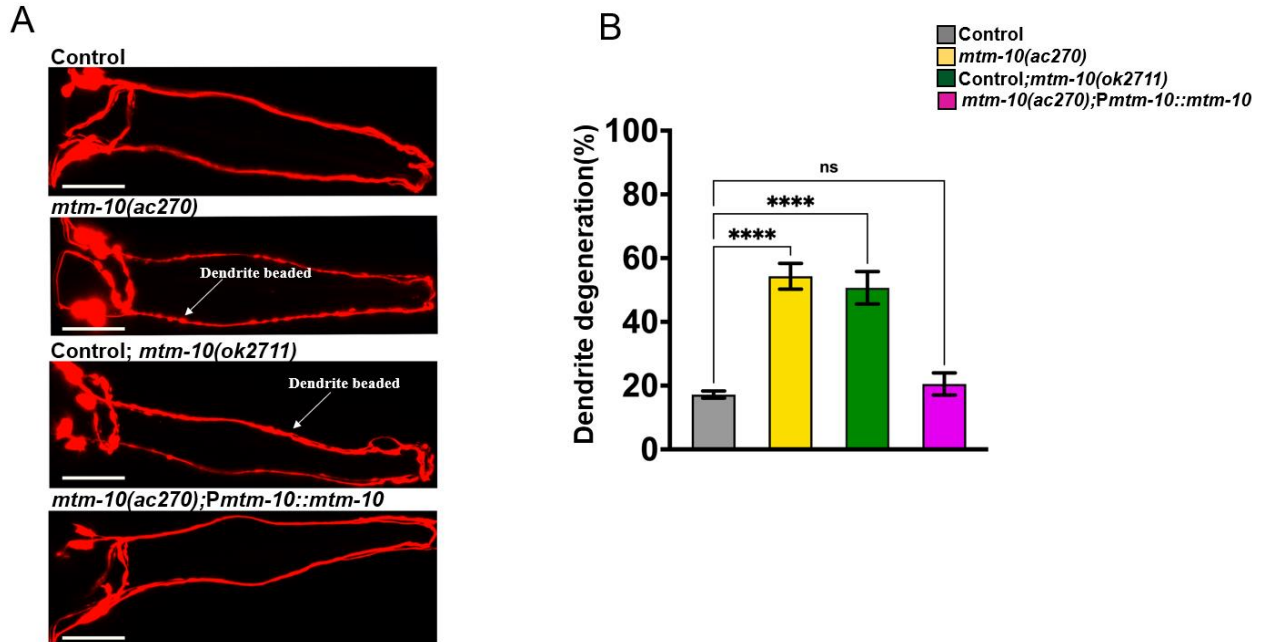

**Figure S5. (A)** Representative photomicrographs of dendrite degeneration in control CX5974 (Parent strain), *mtm-10(ac270)*, *mtm-10(ok2711)*, and *mtm-10(ac270);Pmtm-10::mtm-10* animals expressing RFP in AWC after exposure to paraquat(5mM) for 24 hours. The scale bars represent 10  $\mu$ m. Different morphological changes in the dendrites are indicated with white arrows. **(B)** Quantification of the dendrite degeneration phenotype in control, *mtm-10(ac270)*, *mtm-10(ok2711)*, and *mtm-10(ac270);Pmtm-10::mtm-10* animals expressing RFP in AWC neurons. N=3, number of animals=150. Control vs. *mtm-10(ac270)* ( $p < 0.0001$ ), *mtm-10(ac270)* vs. *mtm-10(ac270);Pmtm-10::mtm-10* ( $p < 0.0001$ ) via one-way ANOVA test.
